# Supplementary material for: A molecular dynamics investigation on the cross-linking and physical properties of epoxy-based materials
Source: Royal Society of Chemistry journal article supplement (doi:10.1039/c4ra04298k), 2014-01-01
Supplement: c4ra04298k1.pdf [file c4ra04298k1.pdf]

# Electronic Supplementary Information for “A molecular dynamics investigation on the cross-linking and physical properties of epoxy-based materials”

Lik-ho Tam<sup>a</sup> and Denvid Lau<sup>\*ab</sup>

<sup>a</sup> Department of Architecture and Civil Engineering, City University of Hong Kong, Hong Kong, China

<sup>b</sup> Department of Civil and Environmental Engineering, Massachusetts Institute of Technology, Cambridge, MA 02139, USA. E-mail: [denvid@mit.edu](mailto:denvid@mit.edu)

## 1. Derivation, parameters validation and potential function of the three forcefields used in the simulations of SU-8 photoresist

The original CVFF potential is derived for small organic crystals, such as amides<sup>1</sup> and carboxyl acids,<sup>2</sup> and further optimized for the simulations of organic, polymeric and biological materials.<sup>3</sup> CVFF has been parameterized against a large range of experimental measurements for peptides, proteins, water and a variety of organic systems.<sup>4, 5</sup> The potential function in CVFF is represented by the superposition of valance and non-bonded interactions. The valance terms are the bonded interactions consisting of two-body bond stretching, three-body angle bending, four-body dihedral angle torsion and four-body improper out-of-plane terms, while non-bonded interactions consist of van der Waals (vdW) and Coulombic terms. The bond stretching term is represented by a Morse functional form in the CVFF derivation.<sup>3, 5</sup> But if the total energy of the simulated model is high, the Morse function will cause the bonded atoms to move far apart unrealistically, which is not desirable during the modeling process. Therefore, a harmonic term is used in the bond stretching interaction instead.<sup>6</sup> In addition, the harmonic terms are also used for the angle bending, dihedral angle torsion and improper out-of-plane interactions, and the energy expression of the improper term is the same of the torsion term. The potential function in CVFF is described in eqn (1).

$$\begin{aligned} U &= U_{\text{bonded}} + U_{\text{non-bonded}} \\ &= \sum_{\text{bond}} \frac{K_b}{2} (b - b_0)^2 + \sum_{\text{angle}} \frac{K_a}{2} (\theta - \theta_0)^2 + \sum_{\text{torsion}} \frac{K_t}{2} [1 + s \cos(n\phi_t)] + \sum_{\text{out-of-plane}} \frac{K_{\text{oop}}}{2} [1 + s \cos(n\phi_i)] \\ &\quad + \sum_{i,j} D_{ij} \left[ \left( \frac{r_{ij}}{r} \right)^{12} - \left( \frac{r_{ij}}{r} \right)^6 \right] + \sum_{i,j} C \frac{q_i q_j}{\epsilon r_{ij}} \end{aligned} \quad (1)$$

where  $K_b$ ,  $K_a$ ,  $K_t$  and  $K_{\text{oop}}$  denote the force constants;  $b_0$ ,  $\theta_0$ ,  $\phi_t$  and  $\phi_i$  denote the equilibrium bond length, bond angle, torsion angle and improper angle, respectively;  $b$  and  $\theta$  is the bond length and bond angle;  $D_{ij}$  is the well depth of vdW term and  $r$  is the vdW length that is equivalent to the distance at which vdW term reaches its minimum state;  $r_{ij}$  is the distance between the atoms  $i$  and  $j$  with charges  $q_i$  and  $q_j$ , respectively.

Dreiding forcefield is developed for the study of biological, organic and some inorganic molecules with a moderate accuracy on the predictions of their structures and physical properties.<sup>7</sup> The forcefield parameters of Dreiding are derived from some simple hybridization rules, which adopt general force constants and geometric parameters in the terms of bonded interactions. Similar to the CVFF, the potential function in Dreiding forcefield is made up of valance and non-bonded interactions, and is shown in eqn (2). A CHARMM<sup>8</sup>-like energy expression is used for the torsional term, and an umbrella functional form is used for the out-of-plane interaction. In particular, the vdW interaction during the MD simulations is represented by a Buckingham function, which is preferred for Dreiding forcefield and is better than the LJ 12-6 function in describing the short-range repulsive interactions, which act on the pair of non-bonded atoms whose distance is less than the value of vdW length.<sup>7</sup>

$$\begin{aligned} U &= U_{\text{bonded}} + U_{\text{non-bonded}} \\ &= \sum_{\text{bond}} \frac{K_b}{2} (b - b_0)^2 + \sum_{\text{angle}} \frac{K_a}{2} (\theta - \theta_0)^2 + \sum_{\text{torsion}} \frac{K_t}{2} \{1 - \cos[n(\phi - \phi_0)]\} + \sum_{\text{out-of-plane}} K_{\text{oop}} [1 - \cos \omega] \\ &\quad + \sum_{i,j} \left[ A_{ij} e^{-B_{ij} r} - \frac{C_{ij}}{r^6} \right] + \sum_{i,j} C \frac{q_i q_j}{\epsilon r_{ij}} \end{aligned} \quad (2)$$

PCFF is a second generation potential improved from CFF91 forcefield,<sup>9, 10</sup> which is originally derived for investigating the alkyl functional group and alkane models, and further developed for computation of polycarbonates<sup>11</sup> and aromatic polyesters.<sup>12</sup> Apart from these applications based on CFF91 forcefield, PCFF is also applicable for the computer simulation of polysilanes.<sup>13</sup> The PCFF has been parameterized and validated for various compounds and functional groups covering a wide spectrum of organic, polymeric, and some inorganic materials, such as polycarbonates, melamine resins, metals and zeolites.<sup>11-14</sup> The potential

function in PCFF is given in eqn (3). The first four terms are bonded interactions of internal coordinates, while several cross-coupling terms are used in this forcefield, including bond-bond, bond-angle, angle-angle, bond-torsion, angle-torsion, and angle-angle-torsion coupling terms, respectively. The non-bonded interactions consist of a vdW term represented by a LJ 9-6 function and a Coulombic term similar to CVFF and Dreiding forcefield.

$$\begin{aligned}
U &= U_{\text{bonded}} + U_{\text{cross-coupling}} + U_{\text{non-bonded}} \\
&= \sum_{n=2}^4 K_{b,n} (b-b_0)^n + \sum_{n=2}^4 K_{a,n} (\theta-\theta_0)^n + \sum_{n=1}^3 K_{t,n} [1-\cos(n\phi-\phi_n)] + \sum_{\text{out-of-plane}} K_{oop} (\chi-\chi_0)^2 \\
&+ \sum_{bb'} K_{bb'} (b-b_0)(b'-b_0') + \sum_{ba} K_{ba} (b-b_0)(\theta-\theta_0) + \sum_{aa'} K_{aa'} (\theta-\theta_0)(\theta'-\theta_0') + \sum_{bt} \left[ K_{bt} (b-b_0) \sum_{n=1}^3 k_{bt,n} \cos n\phi \right] \\
&+ \sum_{at} \left[ K_{at} (\theta-\theta_0) \sum_{n=1}^3 k_{at,n} \cos n\phi \right] + \sum_{aat} \left[ k_{aat} (\theta-\theta_0)(\theta'-\theta_0') \cos \phi \right] \\
&+ \sum_{i,j} D_{ij} \left[ 2 \left( \frac{r_{ij}}{r} \right)^9 - 3 \left( \frac{r_{ij}}{r} \right)^6 \right] + \sum_{i,j} C \frac{q_i q_j}{\epsilon r_{ij}}
\end{aligned} \tag{3}$$

## 2. Parameters of the three forcefields

### CVFF

#### ATOM TYPES

| Type | Mass      | Element | Connections | Comment                                    |
|------|-----------|---------|-------------|--------------------------------------------|
| h    | 1.007970  | H       | 1           | Hydrogen bonded to C                       |
| ho   | 1.007970  | H       | 1           | Hydrogen bonded to O                       |
| c    | 12.011150 | C       | 4           | Sp3 aliphatic carbon                       |
| c3   | 12.011150 | C       | 4           | Sp3 carbon in methyl (CH3) group           |
| c2   | 12.011150 | C       | 4           | Sp3 carbon bonded to 2 H's, 2 heavy atoms  |
| c1   | 12.011150 | C       | 4           | Sp3 carbon bonded to 1 H, 3 Heavy atoms    |
| cp   | 12.011150 | C       | 3           | Sp2 aromatic carbon (partial double bonds) |
| o    | 15.999400 | O       | 2           | Sp3 oxygen in ether or ester groups        |
| oh   | 15.999400 | O       | 2           | Oxygen in hydroxyl (OH) group              |

#### EQUIVALENCE

| Type | NonB | Bond | Angle | Torsion | OOP |
|------|------|------|-------|---------|-----|
| h    | h    | h    | h     | h       | h   |
| ho   | hn   | ho   | ho    | ho      | ho  |
| c    | cg   | c    | c     | c       | c   |
| c3   | cg   | c    | c     | c       | c   |
| c2   | cg   | c    | c     | c       | c   |
| c1   | cg   | c    | c     | c       | c   |
| cp   | c'   | cp   | cp    | cp      | cp  |
| o    | o'   | o    | o     | o       | o'  |
| oh   | o'   | oh   | o     | o       | o'  |

#### QUADRATIC BOND

| I  | J  | R0     | K2       |
|----|----|--------|----------|
| c  | o  | 1.4250 | 273.2000 |
| c  | h  | 1.1050 | 340.6175 |
| c  | c  | 1.5260 | 322.7158 |
| cp | o  | 1.3700 | 384.0000 |
| cp | h  | 1.0800 | 363.4164 |
| cp | cp | 1.3400 | 480.0000 |
| cp | c  | 1.5100 | 283.0924 |
| oh | ho | 0.9600 | 540.6336 |
| oh | c  | 1.4200 | 384.0000 |

#### QUADRATIC ANGLE

| I  | J  | K  | Theta0   | K2      |
|----|----|----|----------|---------|
| h  | c  | h  | 106.4000 | 39.5000 |
| h  | c  | c  | 110.0000 | 44.4000 |
| c  | c  | c  | 110.5000 | 46.6000 |
| c  | o  | ho | 106.0000 | 58.5000 |
| o  | c  | h  | 109.5000 | 57.0000 |
| c  | c  | o  | 109.5000 | 70.0000 |
| cp | cp | h  | 120.0000 | 37.0000 |
| cp | cp | cp | 120.0000 | 90.0000 |
| h  | c  | cp | 110.0000 | 44.4000 |
| c  | cp | cp | 120.0000 | 44.2000 |
| c  | c  | cp | 110.5000 | 46.6000 |
| o  | cp | cp | 120.0000 | 60.0000 |
| cp | o  | c  | 109.5000 | 50.0000 |
| cp | c  | cp | 110.5000 | 46.6000 |
| c  | o  | c  | 109.5000 | 60.0000 |

**TORSION**

| I    | J    | K    | L    | Kphi    | n     | Phi0     |
|------|------|------|------|---------|-------|----------|
| ---- | ---- | ---- | ---- | -----   | ----- | -----    |
| *    | c    | c    | *    | 1.4225  | 3     | 0.0000   |
| *    | c    | o    | *    | 0.3900  | 3     | 0.0000   |
| *    | cp   | cp   | *    | 12.0000 | 2     | 180.0000 |
| *    | cp   | c    | *    | 0.0000  | 2     | 0.0000   |
| cp   | cp   | c    | cp   | 0.6750  | 4     | 0.0000   |
| *    | cp   | o    | *    | 1.5000  | 2     | 180.0000 |
| cp   | cp   | o    | c    | 1.8000  | 2     | 180.0000 |

**OUT-OF-PLANE**

| I    | J    | K    | L    | Kchi   | n     | Chi0     |
|------|------|------|------|--------|-------|----------|
| ---- | ---- | ---- | ---- | -----  | ----- | -----    |
| cp   | cp   | cp   | h    | 0.3700 | 2     | 180.0000 |
| cp   | cp   | cp   | c    | 0.3700 | 2     | 180.0000 |
| cp   | cp   | cp   | cp   | 0.3700 | 2     | 180.0000 |
| cp   | cp   | cp   | o'   | 0.0000 | 2     | 180.0000 |

**NON-BOND (LJ 12-6)**

| I    | A            | B          |
|------|--------------|------------|
| ---- | -----        | -----      |
| h    | 7108.4660    | 32.87076   |
| hn   | 0.00000001   | 0.00000    |
| cg   | 1790340.7240 | 528.48190  |
| c'   | 2968753.3590 | 1325.70810 |
| o'   | 272894.7846  | 498.87880  |

**BOND INCREMENTS**

| I    | J    | DeltaIJ | DeltaJI |
|------|------|---------|---------|
| ---- | ---- | -----   | -----   |
| oh   | ho   | -0.3500 | 0.3500  |
| c    | c    | 0.0000  | 0.0000  |
| c    | cp   | 0.0000  | 0.0000  |
| c    | o    | 0.1500  | -0.1500 |
| c    | oh   | 0.0300  | -0.0300 |
| c    | h    | -0.1000 | 0.1000  |
| cp   | cp   | 0.0000  | 0.0000  |
| cp   | o    | 0.0282  | -0.0282 |
| cp   | h    | -0.1000 | 0.1000  |

**Dreiding Forcefield****ATOM TYPES**

| Type | Mass      | Element | Connections | Comment                                                         |
|------|-----------|---------|-------------|-----------------------------------------------------------------|
| ---- | -----     | -----   | -----       | -----                                                           |
| H_   | 1.0080000 | H       | 1           | Normal Hydrogen                                                 |
| H__A | 1.0080000 | H       | 1           | Hydrogen capable of hydrogen bonding, i.e. bonded to N, O and S |
| C_3  | 12.011000 | C       | 4           | sp3 Carbon                                                      |
| C_R  | 12.011000 | C       | 3           | Resonant Carbon, i.e. in benzene                                |
| O_3  | 15.999400 | O       | 2           | sp3 Oxygen                                                      |
| O_R  | 15.999400 | O       | 2           | Resonant Oxygen, i.e. in furan                                  |

**QUADRATIC BOND**

| I    | J    | R0     | K2    |
|------|------|--------|-------|
| ---- | ---- | -----  | ----- |
| C_R  | C_3  | 1.4600 | 350.0 |
| C_3  | H_   | 1.0900 | 350.0 |
| C_R  | C_R  | 1.3900 | 525.0 |
| O_R  | C_R  | 1.3500 | 525.0 |

|     |      |        |       |
|-----|------|--------|-------|
| O_3 | C_3  | 1.4200 | 350.0 |
| C_R | H_   | 1.0200 | 350.0 |
| C_3 | C_3  | 1.5300 | 350.0 |
| O_R | C_3  | 1.4200 | 350.0 |
| O_3 | H__A | 0.9800 | 350.0 |

#### QUADRATIC ANGLE

| I | J   | K | Theta0  | K2 |
|---|-----|---|---------|----|
| * | C_3 | * | 109.471 | 50 |
| * | C_R | * | 120     | 50 |
| * | O_3 | * | 104.51  | 50 |
| * | O_R | * | 120     | 50 |

#### TORSION

| I | J   | K   | L | Kphi | n | d   |
|---|-----|-----|---|------|---|-----|
| * | C_3 | C_3 | * | 1    | 3 | 0   |
| * | C_3 | C_R | * | 1    | 3 | 0   |
| * | C_3 | O_3 | * | 1    | 3 | 0   |
| * | C_3 | O_R | * | 1    | 3 | 0   |
| * | C_R | C_R | * | 12.5 | 2 | 180 |
| * | C_R | O_R | * | 12.5 | 2 | 180 |

#### OUT-OF-PLANE

| I | J | K | L   | Kchi | Chi0 |
|---|---|---|-----|------|------|
| * | * | * | C_R | 40   | 0    |
| * | * | * | O_R | 40   | 0    |

#### NON-BOND (X6)

| I    | R      | D      |
|------|--------|--------|
| H_   | 3.195  | 0.0152 |
| H__A | 3.195  | 0.0152 |
| C_3  | 3.8983 | 0.0951 |
| C_R  | 3.8983 | 0.0951 |
| O_3  | 3.4046 | 0.0957 |
| O_R  | 3.4046 | 0.0957 |

#### PCFF

##### ATOM TYPES

| Type | Mass     | Element | Connections | Comment                                      |
|------|----------|---------|-------------|----------------------------------------------|
| hc   | 1.007970 | H       | 1           | Hydrogen bonded to C                         |
| ho   | 1.007970 | H       | 1           | hydrogen bonded to oxygen                    |
| c    | 12.01115 | C       | 4           | generic SP3 carbon                           |
| c1   | 12.01115 | C       | 4           | sp3 carbon with 1 H 3 heavies                |
| c2   | 12.01115 | C       | 4           | sp3 carbon with 2 H's, 2 Heavy's             |
| c3   | 12.01115 | C       | 4           | sp3 carbon with 3 hHs 1 heavy                |
| c3h  | 12.01115 | C       | 4           | sp3 carbon in 3-membered ring with hydrogens |
| cp   | 12.01115 | C       | 3           | sp2 aromatic carbon                          |
| o3e  | 15.99940 | O       | 2           | sp3 oxygen in three membered ring            |
| oc   | 15.99940 | O       | 2           | sp3 oxygen in ether or acetals               |
| oh   | 15.99940 | O       | 2           | oxygen bonded to hydrogen                    |

#### EQUIVALENCE

Equivalences

| Type | NonB | Bond | Angle | Torsion | OOP |
|------|------|------|-------|---------|-----|
|------|------|------|-------|---------|-----|

|     |    |    |    |    |    |
|-----|----|----|----|----|----|
| hc  | h  | h  | h  | h  | h  |
| ho  | h* | h* | h* | h* | h* |
| c   | c  | c  | c  | c  | c  |
| c1  | c  | c  | c  | c  | c  |
| c2  | c  | c  | c  | c  | c  |
| c3  | c  | c  | c  | c  | c  |
| c3h | c  | c  | c  | c  | c  |
| cp  | cp | cp | cp | cp | cp |
| o3e | o  | o  | o  | o  | o  |
| oc  | o  | o  | o  | o  | o  |
| oh  | o  | o  | o  | o  | o  |

#### QUARTIC BOND

| I  | J  | R0     | K2       | K3         | K4        |
|----|----|--------|----------|------------|-----------|
| c  | c  | 1.5300 | 299.6700 | -501.7700  | 679.8100  |
| c  | cp | 1.5010 | 321.9021 | -521.8208  | 572.1628  |
| c  | h  | 1.1010 | 345.0000 | -691.8900  | 844.6000  |
| c  | o  | 1.4200 | 400.3954 | -835.1951  | 1313.0142 |
| cp | cp | 1.4170 | 470.8361 | -627.6179  | 1327.6345 |
| cp | h  | 1.0982 | 372.8251 | -803.4526  | 894.3173  |
| cp | o  | 1.3768 | 428.8798 | -738.2351  | 1114.9655 |
| h  | h  | 0.7414 | 414.0000 | 0.0000     | 0.0000    |
| h* | o  | 0.9650 | 532.5062 | -1282.9050 | 2004.7658 |

#### QUARTIC ANGLE

| I  | J  | K  | Theta0   | K2      | K3       | K4       |
|----|----|----|----------|---------|----------|----------|
| c  | c  | c  | 112.6700 | 39.5160 | -7.4430  | -9.5583  |
| c  | c  | cp | 108.4000 | 43.9594 | -8.3924  | -9.3379  |
| c  | c  | h  | 110.7700 | 41.4530 | -10.6040 | 5.1290   |
| c  | c  | o  | 111.2700 | 54.5381 | -8.3642  | -13.0838 |
| cp | c  | cp | 111.0000 | 44.3234 | -9.4454  | 0.0000   |
| cp | c  | h  | 111.0000 | 44.3234 | -9.4454  | 0.0000   |
| h  | c  | h  | 107.6600 | 39.6410 | -12.9210 | -2.4318  |
| h  | c  | o  | 108.7280 | 58.5446 | -10.8088 | -12.4006 |
| c  | cp | cp | 120.0500 | 44.7148 | -22.7352 | 0.0000   |
| cp | cp | cp | 118.9000 | 61.0226 | -34.9931 | 0.0000   |
| cp | cp | h  | 117.9400 | 35.1558 | -12.4682 | 0.0000   |
| cp | cp | o  | 123.4200 | 73.6781 | -21.6787 | 0.0000   |
| c  | o  | c  | 104.5000 | 35.7454 | -10.0067 | -6.2729  |
| c  | o  | cp | 102.9695 | 38.9739 | -6.2595  | -8.1710  |
| c  | o  | h* | 105.8000 | 52.7061 | -12.1090 | -9.8681  |
| cp | o  | h* | 108.1900 | 53.1250 | -8.5016  | 0.0000   |

#### TORSION

| I  | J | K  | L  | V(1)    | Phi1(0) | V(2)    | Phi2(0) | V(3)    | Phi3(0) |
|----|---|----|----|---------|---------|---------|---------|---------|---------|
| c  | c | c  | c  | 0.0000  | 0.0     | 0.0514  | 0.0     | -0.1430 | 0.0     |
| c  | c | c  | h  | 0.0000  | 0.0     | 0.0316  | 0.0     | -0.1681 | 0.0     |
| c  | c | c  | o  | 0.7137  | 0.0     | 0.2660  | 0.0     | -0.2545 | 0.0     |
| h  | c | c  | h  | -0.1432 | 0.0     | 0.0617  | 0.0     | -0.1083 | 0.0     |
| h  | c | c  | o  | -0.1435 | 0.0     | 0.2530  | 0.0     | -0.0905 | 0.0     |
| o  | c | c  | o  | -0.1820 | 0.0     | -0.1084 | 0.0     | -0.7047 | 0.0     |
| c  | c | cp | cp | -0.2802 | 0.0     | -0.0678 | 0.0     | -0.0122 | 0.0     |
| cp | c | cp | cp | -0.2802 | 0.0     | -0.0678 | 0.0     | -0.0122 | 0.0     |
| h  | c | cp | cp | -0.2801 | 0.0     | -0.0678 | 0.0     | -0.0122 | 0.0     |
| c  | c | o  | c  | -0.5203 | 0.0     | -0.3028 | 0.0     | -0.3450 | 0.0     |
| c  | c | o  | h* | -0.6732 | 0.0     | -0.4778 | 0.0     | -0.1670 | 0.0     |
| h  | c | o  | c  | 0.5302  | 0.0     | 0.0000  | 0.0     | -0.3966 | 0.0     |

|    |    |    |    |         |     |         |     |         |     |
|----|----|----|----|---------|-----|---------|-----|---------|-----|
| h  | c  | o  | cp | 0.9513  | 0.0 | 0.1155  | 0.0 | 0.0720  | 0.0 |
| h  | c  | o  | h* | 0.1863  | 0.0 | -0.4338 | 0.0 | -0.2121 | 0.0 |
| c  | cp | cp | cp | 0.0000  | 0.0 | 4.4072  | 0.0 | 0.0000  | 0.0 |
| c  | cp | cp | h  | 0.0000  | 0.0 | 1.5590  | 0.0 | 0.0000  | 0.0 |
| cp | cp | cp | cp | 8.3667  | 0.0 | 1.1932  | 0.0 | 0.0000  | 0.0 |
| cp | cp | cp | h  | 0.0000  | 0.0 | 3.9661  | 0.0 | 0.0000  | 0.0 |
| cp | cp | cp | o  | 0.0000  | 0.0 | 4.8498  | 0.0 | 0.0000  | 0.0 |
| h  | cp | cp | h  | 0.0000  | 0.0 | 1.8769  | 0.0 | 0.0000  | 0.0 |
| h  | cp | cp | o  | 0.0000  | 0.0 | 1.7234  | 0.0 | 0.0000  | 0.0 |
| cp | cp | o  | c  | 0.0000  | 0.0 | 1.5000  | 0.0 | 0.0000  | 0.0 |
| cp | cp | o  | h* | -0.6900 | 0.0 | 0.5097  | 0.0 | 0.0095  | 0.0 |
| cp | c  | c  | h  | -0.0228 | 0.0 | 0.0280  | 0.0 | -0.1863 | 0.0 |

#### OUT-OF-PLANE

| I    | J    | K    | L    | KChi    | Chi0   |
|------|------|------|------|---------|--------|
| ---- | ---- | ---- | ---- | -----   | -----  |
| c    | cp   | cp   | cp   | 7.8153  | 0.0000 |
| cp   | cp   | cp   | cp   | 7.1794  | 0.0000 |
| cp   | cp   | cp   | h    | 4.8912  | 0.0000 |
| cp   | cp   | cp   | o    | 13.0421 | 0.0000 |

#### BOND-BOND

| I    | J    | K    | K(b,b') |
|------|------|------|---------|
| ---- | ---- | ---- | -----   |
| c    | c    | c    | 0.0000  |
| c    | c    | cp   | 0.0000  |
| c    | c    | h    | 3.3872  |
| c    | c    | o    | 11.4318 |
| cp   | c    | h    | 2.9168  |
| h    | c    | h    | 5.3316  |
| h    | c    | o    | 23.1979 |
| c    | cp   | cp   | 12.0676 |
| cp   | cp   | cp   | 68.2856 |
| cp   | cp   | h    | 1.0795  |
| cp   | cp   | o    | 48.4754 |
| c    | o    | c    | -7.1131 |
| c    | o    | h*   | -9.6879 |

#### BOND-BOND-13

| I    | J    | K    | L    | K(b,b') |
|------|------|------|------|---------|
| ---- | ---- | ---- | ---- | -----   |
| h    | c    | cp   | cp   | -3.4826 |
| c    | cp   | cp   | cp   | 2.5085  |
| c    | cp   | cp   | h    | 0.8743  |
| cp   | cp   | cp   | cp   | 53.0000 |
| cp   | cp   | cp   | h    | -6.2741 |
| cp   | cp   | cp   | o    | -2.2436 |
| h    | cp   | cp   | h    | -1.7077 |
| h    | cp   | cp   | o    | 2.0517  |
| cp   | cp   | o    | h*   | 1.1590  |

#### BOND-ANGLE

| I    | J    | K    | K(b,theta) | K(b',theta) |
|------|------|------|------------|-------------|
| ---- | ---- | ---- | -----      | -----       |
| c    | c    | c    | 8.0160     |             |
| c    | c    | cp   | 0.0000     | 0.0000      |
| c    | c    | h    | 20.7540    | 11.4210     |
| c    | c    | o    | 2.6868     | 20.4033     |
| cp   | c    | h    | 26.4608    | 11.7717     |
| h    | c    | h    | 18.1030    |             |
| h    | c    | o    | 4.6189     | 55.3270     |

|    |    |    |         |          |
|----|----|----|---------|----------|
| c  | cp | cp | 47.0579 | 31.0771  |
| cp | cp | cp | 28.8708 |          |
| cp | cp | h  | 20.0033 | 24.2183  |
| cp | cp | o  | 58.4790 | 107.6806 |
| c  | o  | c  | -2.8112 |          |
| c  | o  | h* | 28.5800 | 18.9277  |
| cp | o  | h* | 53.8614 | 23.9224  |

#### ANGLE-ANGLE

| I    | J    | K    | L    | K(theta,theta') |
|------|------|------|------|-----------------|
| ---- | ---- | ---- | ---- | -----           |
| c    | c    | c    | c    | -0.1729         |
| c    | c    | c    | h    | -1.3199         |
| c    | c    | c    | o    | -0.8330         |
| cp   | c    | c    | h    | -1.8202         |
| h    | c    | c    | h    | -0.4825         |
| h    | c    | c    | o    | 2.5926          |
| c    | c    | h    | c    | 0.1184          |
| c    | c    | h    | cp   | 1.0827          |
| c    | c    | h    | h    | 0.2738          |
| c    | c    | h    | o    | 3.9177          |
| cp   | c    | h    | h    | 2.3794          |
| h    | c    | h    | h    | -0.3157         |
| h    | c    | h    | o    | 2.4259          |
| c    | c    | o    | c    | -3.5744         |
| c    | c    | o    | h    | 0.1689          |
| h    | c    | o    | h    | 2.1283          |
| cp   | cp   | c    | cp   | 0.0000          |
| c    | cp   | cp   | cp   | 0.0000          |
| cp   | cp   | cp   | cp   | 0.0000          |
| cp   | cp   | cp   | h    | 0.0000          |
| cp   | cp   | cp   | o    | 0.0000          |
| cp   | cp   | h    | cp   | 0.0000          |
| cp   | cp   | o    | cp   | 0.0000          |

#### END-BOND-TORSION

| I    | J    | K    | L    | LEFT    |         |         | RIGHT   |         |         |
|------|------|------|------|---------|---------|---------|---------|---------|---------|
|      |      |      |      | F(1)    | F(2)    | F(3)    | F(1)    | F(2)    | F(3)    |
| ---- | ---- | ---- | ---- | -----   | -----   | -----   | -----   | -----   | -----   |
| c    | c    | c    | c    | -0.0732 | 0.0000  | 0.0000  |         |         |         |
| c    | c    | c    | h    | 0.2486  | 0.2422  | -0.0925 | 0.0814  | 0.0591  | 0.2219  |
| c    | c    | c    | o    | -0.3190 | 0.4411  | -0.7174 | 1.1538  | 0.8409  | -0.9138 |
| h    | c    | c    | h    | 0.2130  | 0.3120  | 0.0777  |         |         |         |
| h    | c    | c    | o    | 0.9681  | 0.9551  | 0.0436  | 0.5903  | 0.6669  | 0.8584  |
| o    | c    | c    | o    | 1.0165  | 0.7553  | -0.4609 |         |         |         |
| c    | c    | cp   | cp   | 0.0000  | 0.0000  | 0.0000  | 0.0000  | 0.0000  | 0.0000  |
| h    | c    | cp   | cp   | 1.3997  | 0.7756  | 0.0000  | -0.5835 | 1.1220  | 0.3978  |
| c    | c    | o    | c    | -0.2456 | 1.0517  | -0.7795 | 0.4741  | 1.2635  | 0.5576  |
| c    | c    | o    | h*   | -0.5800 | 0.9004  | 0.0000  | 0.0000  | 0.5343  | 0.9025  |
| h    | c    | o    | c    | -0.6054 | 1.3339  | 0.9648  | -0.1620 | 0.1564  | -1.1408 |
| h    | c    | o    | h*   | -1.7554 | 1.3145  | 0.2263  | 0.2493  | 0.6803  | 0.0000  |
| c    | cp   | cp   | cp   | 0.0000  | 0.2421  | 0.0000  | 0.0000  | -0.6918 | 0.0000  |
| c    | cp   | cp   | h    | 0.0000  | -1.7970 | 0.0000  | 0.0000  | -0.4879 | 0.0000  |
| cp   | cp   | cp   | cp   | -0.1185 | 6.3204  | 0.0000  |         |         |         |
| cp   | cp   | cp   | h    | 0.0000  | -6.8958 | 0.0000  | 0.0000  | -0.4669 | 0.0000  |
| cp   | cp   | cp   | o    | 0.0000  | 0.2655  | 0.0000  | 0.0000  | 4.8905  | 0.0000  |
| h    | cp   | cp   | h    | 0.0000  | -0.6890 | 0.0000  |         |         |         |
| h    | cp   | cp   | o    | 0.0000  | -1.5867 | 0.0000  | 0.0000  | 4.2641  | 0.0000  |
| cp   | cp   | o    | h*   | 0.9000  | -1.3456 | 1.1900  | 3.4132  | 0.5873  | -0.1323 |



**MIDDLE-BOND-TORSION**

| I  | J  | K  | L  | F(1)     | F(2)    | F(3)    |
|----|----|----|----|----------|---------|---------|
| c  | c  | c  | c  | -17.7870 | -7.1877 | 0.0000  |
| c  | c  | c  | h  | -14.8790 | -3.6581 | -0.3138 |
| c  | c  | c  | o  | -21.8842 | -7.6764 | -0.6868 |
| cp | c  | c  | h  | 0.0000   | 0.0000  | 0.0000  |
| h  | c  | c  | h  | -14.2610 | -0.5322 | -0.4864 |
| h  | c  | c  | o  | -16.7975 | -1.2296 | -0.2750 |
| c  | c  | o  | c  | -5.9288  | -2.7007 | -0.3175 |
| c  | c  | o  | h* | 1.2472   | 0.0000  | 0.7485  |
| h  | c  | o  | c  | -6.8007  | -4.6546 | -1.4101 |
| h  | c  | o  | h* | 0.0000   | 0.9241  | -0.5889 |
| c  | cp | cp | cp | 0.0000   | 9.1792  | 0.0000  |
| c  | cp | cp | h  | 0.0000   | 3.9421  | 0.0000  |
| cp | cp | cp | cp | 27.5989  | -2.3120 | 0.0000  |
| cp | cp | cp | h  | 0.0000   | -1.1521 | 0.0000  |
| cp | cp | cp | o  | 0.0000   | 4.8255  | 0.0000  |
| h  | cp | cp | h  | 0.0000   | 4.8228  | 0.0000  |
| h  | cp | cp | o  | 0.0000   | 5.5432  | 0.0000  |
| cp | cp | o  | h* | 1.1580   | 3.2697  | 3.5132  |

**ANGLE-TORSION**

| I  | J  | K  | L  | LEFT    |         |         | RIGHT   |         |         |
|----|----|----|----|---------|---------|---------|---------|---------|---------|
|    |    |    |    | F(1)    | F(2)    | F(3)    | F(1)    | F(2)    | F(3)    |
| c  | c  | c  | c  | 0.3886  | -0.3139 | 0.1389  |         |         |         |
| c  | c  | c  | h  | -0.2454 | 0.0000  | -0.1136 | 0.3113  | 0.4516  | -0.1988 |
| c  | c  | c  | o  | 0.5623  | -0.3041 | -0.4015 | 0.9672  | -0.7566 | -1.2331 |
| cp | c  | c  | h  | 0.0000  | 0.0000  | 0.0000  | 0.0000  | 0.0000  | 0.0000  |
| h  | c  | c  | h  | -0.8085 | 0.5569  | -0.2466 |         |         |         |
| h  | c  | c  | o  | 2.3668  | 2.4920  | -1.0122 | -0.1892 | 0.4918  | 0.7273  |
| o  | c  | c  | o  | 0.5511  | 0.9737  | -0.6673 |         |         |         |
| c  | c  | cp | cp | 0.0000  | 0.0000  | 0.0000  | 0.0000  | 0.0000  | 0.0000  |
| h  | c  | cp | cp | 4.6266  | 0.1632  | 0.0461  | 0.2251  | 0.6548  | 0.1237  |
| c  | c  | o  | c  | -2.7466 | 1.4877  | -0.8955 | 0.5676  | 0.9450  | 0.0703  |
| c  | c  | o  | h* | -3.5903 | 2.5225  | 0.4888  | 0.8726  | -0.3577 | 0.3888  |
| h  | c  | o  | c  | -1.8234 | 1.6393  | 0.5144  | -0.7777 | 0.4340  | -0.6653 |
| h  | c  | o  | h* | -3.4060 | 1.6396  | 0.0737  | 0.0000  | -0.2810 | -0.5944 |
| c  | cp | cp | cp | 0.0000  | -4.4683 | 0.0000  | 0.0000  | 3.8987  | 0.0000  |
| cp | cp | cp | h  | 0.0000  | 2.5014  | 0.0000  | 0.0000  | 2.7147  | 0.0000  |
| cp | cp | cp | o  | 0.0000  | 10.0155 | 0.0000  | 0.0000  | 1.7404  | 0.0000  |
| h  | cp | cp | h  | 0.0000  | 2.4501  | 0.0000  |         |         |         |
| h  | cp | cp | o  | 0.0000  | 1.8729  | 0.0000  | 0.0000  | 2.5706  | 0.0000  |
| c  | cp | cp | h  | 0.0000  | -0.1242 | 0.0000  | 0.0000  | 3.4601  | 0.0000  |
| cp | cp | o  | h* | -5.1360 | -1.0122 | 0.0000  | 4.6852  | 0.0230  | -0.5980 |

**ANGLE-ANGLE-TORSION**

| I  | J | K  | L  | K(Ang,Ang,Tor) |
|----|---|----|----|----------------|
| c  | c | c  | c  | -22.0450       |
| c  | c | c  | h  | -16.1640       |
| c  | c | c  | o  | -29.0420       |
| cp | c | c  | h  | 0.0000         |
| h  | c | c  | h  | -12.5640       |
| h  | c | c  | o  | -20.2006       |
| o  | c | c  | o  | -14.0484       |
| c  | c | cp | cp | 0.0000         |
| h  | c | cp | cp | -5.8888        |
| c  | c | o  | c  | -19.0059       |

|    |    |    |    |          |
|----|----|----|----|----------|
| c  | c  | o  | h* | -12.1038 |
| h  | c  | o  | c  | -16.4438 |
| h  | c  | o  | h* | -10.5093 |
| c  | cp | cp | cp | -14.4097 |
| c  | cp | cp | h  | 4.4444   |
| cp | cp | cp | cp | 0.0000   |
| cp | cp | cp | h  | -4.8141  |
| cp | cp | cp | o  | -21.0247 |
| h  | cp | cp | o  | 4.2296   |
| cp | cp | o  | h* | -4.6072  |

**NON-BOND (LJ 9-6)**

| I    | r      | eps     |
|------|--------|---------|
| ---- | -----  | -----   |
| c    | 4.0100 | 0.05400 |
| cp   | 4.0100 | 0.06400 |
| h    | 2.9950 | 0.02000 |
| h*   | 1.0980 | 0.01300 |
| o    | 3.5350 | 0.24000 |

**BOND INCREMENTS**

| I    | J    | DeltaIJ | DeltaJI |
|------|------|---------|---------|
| ---- | ---- | -----   | -----   |
| c    | c    | 0.0000  | 0.0000  |
| c    | cp   | 0.0000  | 0.0000  |
| c    | h    | -0.0530 | 0.0530  |
| c    | o    | 0.1330  | -0.1330 |
| cp   | cp   | 0.0000  | 0.0000  |
| cp   | h    | -0.1268 | 0.1268  |
| cp   | o    | 0.0265  | -0.0265 |
| h*   | o    | 0.4241  | -0.4241 |

### 3. Maximum reaction radius and cross-linking degree in the modeling of SU-8 photoresist

It is believed that a longer equilibration before the cross-linking reaction can enhance the atom diffusion and thus it can result in a more relaxed structure. The influence of equilibration on the maximum reaction radius and cross-linking degree is investigated by alternating the equilibration scheme before the cross-linking reaction. The final cross-linked structure from the CVFF simulation is chosen as an illustration. The cross-linked structure undergoes a 10 ns equilibration (5 ns NVT + 5 ns NPT) before the cross-linking process at a larger reaction radius. Another set of cross-linking process is performed using the original equilibration scheme (5 ps NVT+ 5 ps NPT). It is found that the cross-linking process can be successfully performed at a maximum reaction radius of 11 Å for both cases. At a reaction radius larger than 11 Å, there increase a large amount of atom pairs whose distance is smaller than the reaction radius. The computational power required in searching the potential reactive atoms from those recognized atom pairs exceeds our available computational resource. And the cross-linking process can only succeed at a maximum reaction radius of 11 Å. The obtained cross-linking degree for both cases is plotted in Fig. S1. It can be seen that at the extended reaction radius, new cross-links are formed slowly for both cross-linking process. The final cross-linking degree of the model after 10 ns equilibration is 85%, while the original model is 84%. It is noted that a longer equilibration enhances the formation of cross-links, but it demands more computational power than the proposed equilibration scheme. Considering a large computational consumption and a limited improvement in terms of the cross-linking degree, current reaction radius range and equilibration process can be considered reasonable.

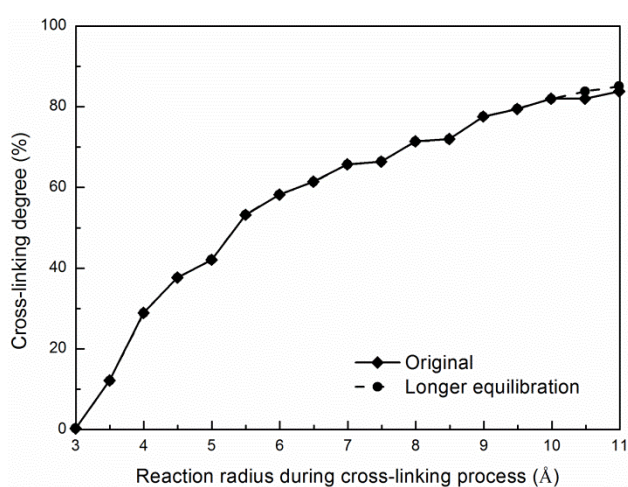

Fig. S1 Cross-linking degree of SU-8 photoresist as a function of reaction radius under CVFF forcefield.

#### 4. Potential energy and density of the cross-linked SU-8 photoresist

The potential energy and density of the cross-linked SU-8 epoxy network as a function of the simulation time is shown in Fig. S2. Data are recorded at the last 5 ns NPT equilibration run as indicated in TABLE 1 shown in the paper. The variation of potential energy in the cross-linked system is small along the simulation time, which implies that the cross-linked structure is close to an equilibrium state. In addition, the density at the last 2 ns simulation is relatively stable for the three cases, which indicates the equilibrium state is reached in the three systems.

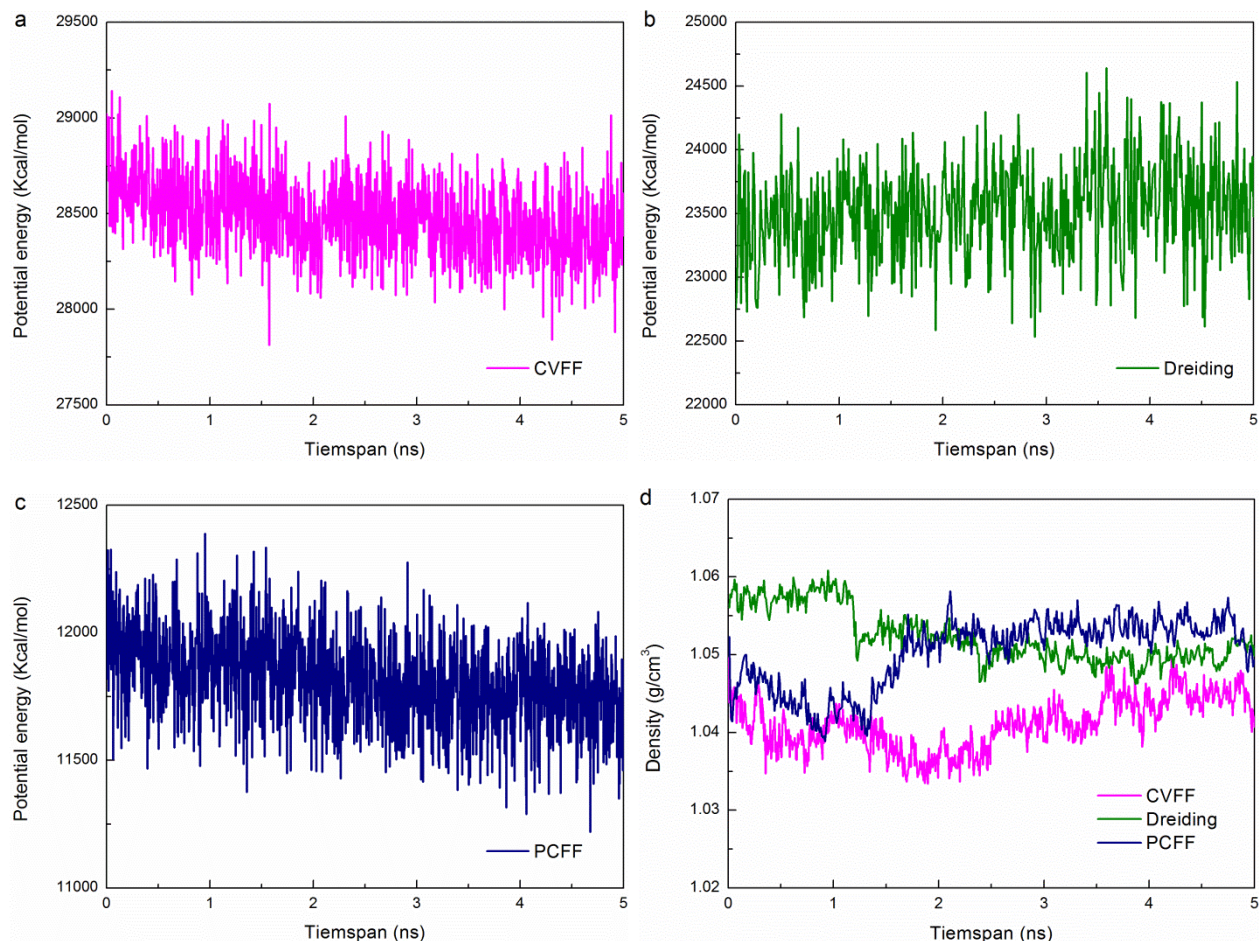

Fig. S2 Evolution of (a, b, c) potential energy and (d) density in the 5 ns NPT equilibration run under three forcefields.

## 5. Size effect on the physical properties of SU-8 photoresist

In order to investigate the size effect on the physical properties of SU-8 photoresist, a larger system originated from 15920 atoms (80 monomers) is simulated and compared with the original smaller system (40 monomers). The simulation is performed using CVFF forcefield as an example. The modeling and simulation conditions are the same as reported in the paper. The cross-linking degree of the two SU-8 epoxy networks is shown in Fig. S3. The trend of the two resulted curves is very similar, leading to a cross-linking degree of 78% for the larger system, while the value of the smaller system is 82%. Meanwhile, the computed density ( $\rho$ ) and Young's modulus ( $E$ ) of the larger cross-linked structure are compared with the results of the smaller system, as shown in Table S1. The densities of the two cross-linked structures are nearly the same, and the measured Young's moduli are also very close between these two systems. In view of the computed cross-linking degree,  $\rho$  and  $E$ , a good agreement is observed between the two models with different sizes. Thus, it indicates the size adopted in the original paper is large enough for evaluating the mechanical properties of cross-linked SU-8 photoresist.

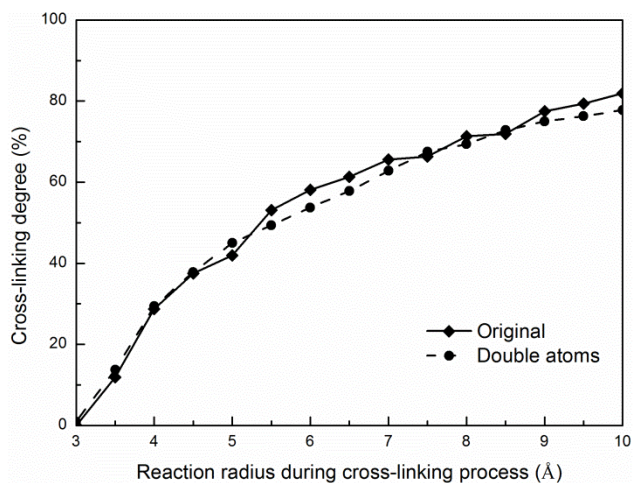

Fig. S3 Cross-linking degree of the original and larger SU-8 photoresist as a function of reaction radius under CVFF forcefield.

TABLE S1 Physical properties of original and larger SU-8 photoresist at 300 K.

| Monomers                     | CVFF          |               | Expt.                    |
|------------------------------|---------------|---------------|--------------------------|
|                              | 40            | 80            |                          |
| $\rho$ (g cm <sup>-3</sup> ) | 1.044 ± 0.002 | 1.046 ± 0.001 | 1.07 ~ 1.20 (ref. 15)    |
| $E$ (GPa)                    | 4.425 ± 0.230 | 4.286 ± 0.467 | 2.70 ~ 4.02 (ref. 16-19) |

## References

1. A. T. Hagler, E. Huler and S. Lifson, *Journal of the American Chemical Society*, 1974, **96**, 5319-5327.
2. S. Lifson, A. T. Hagler and P. Dauber, *Journal of the American Chemical Society*, 1979, **101**, 5111-5121.
3. J. R. Maple, U. Dinur and A. T. Hagler, *Proceedings of the National Academy of Sciences*, 1988, **85**, 5350-5354.
4. A. T. Hagler and S. Lifson, *Journal of the American Chemical Society*, 1974, **96**, 5327-5335.
5. P. Dauber-Osguthorpe, V. A. Roberts, D. J. Osguthorpe, J. Wolff, M. Genest and A. T. Hagler, *Proteins: Structure, Function, and Bioinformatics*, 1988, **4**, 31-47.
6. F. Ritschl, M. Fait, K. Fiedler, J. E. Köhler, B. Kubias and M. Meisel, *Zeitschrift für anorganische und allgemeine Chemie*, 2002, **628**, 1385-1396.
7. S. L. Mayo, B. D. Olafson and W. A. Goddard, *Journal of Physical Chemistry*, 1990, **94**, 8897-8909.
8. A. D. MacKerell, D. Bashford, M. Bellott, R. Dunbrack, J. Evanseck, M. J. Field, S. Fischer, J. Gao, H. Guo and S. Ha, *The Journal of Physical Chemistry B*, 1998, **102**, 3586-3616.
9. J. R. Maple, M. J. Hwang, T. P. Stockfisch, U. Dinur, M. Waldman, C. S. Ewig and A. T. Hagler, *Journal of computational chemistry*, 1994, **15**, 162-182.
10. M. J. Hwang, T. P. Stockfisch and A. T. Hagler, *Journal of the American Chemical Society*, 1994, **116**, 2515-2525.
11. H. Sun, S. J. Mumby, J. R. Maple and A. T. Hagler, *Journal of the American Chemical Society*, 1994, **116**, 2978-2987.
12. H. Sun, *Journal of computational chemistry*, 1994, **15**, 752-768.
13. H. Sun, *Macromolecules*, 1995, **28**, 701-712.
14. J. R. Hill and J. Sauer, *The Journal of Physical Chemistry*, 1994, **98**, 1238-1244.
15. MicroChem.
16. H. Lorenz, M. Despont, N. Fahrni, N. LaBianca, P. Renaud and P. Vettiger, *Journal of Micromechanics and Microengineering*, 1997, **7**, 121.
17. R. Feng and R. J. Farris, *Journal of materials science*, 2002, **37**, 4793-4799.
18. R. Feng and R. J. Farris, *Journal of Micromechanics and Microengineering*, 2003, **13**, 80.
19. J. Hammacher, A. Fuelle, J. Flaemig, J. Saupe, B. Loechel and J. Grimm, *Microsystem Technologies*, 2008, **14**, 1515-1523.
